# Supplementary material
Source: PubMed Central journal article supplement (PMC6827316)
Supplement: supp_RA119.007796_143452_2_supp_394712_pxs2vt.pdf [file supp_RA119.007796_143452_2_supp_394712_pxs2vt.pdf]

Supplementary Information for

The human cytomegalovirus-encoded G protein-coupled receptor UL33 exhibits oncomodulatory properties

Jeffrey R. van Senten, Maarten P. Bebelman, Tian Shu Fan, Raimond Heukers, Nick D. Bergkamp, Puck van Gasselt, Ellen V. Langemeijer, Erik Slinger, Tonny Lagerweij, Afsar Rahbar, Marijke Stigter-van Walsum, David Maussang, Rob Leurs, René J.P. Musters, Guus A.M.S. van Dongen, Cecilia Söderberg-Nauclér, Thomas Würdinger, Marco Siderius, Martine J. Smit

Martine J. Smit

Email: [mj.smit@vu.nl](mailto:mj.smit@vu.nl)

**This PDF file includes:**

Figs. S1 to S5

References for SI reference citations

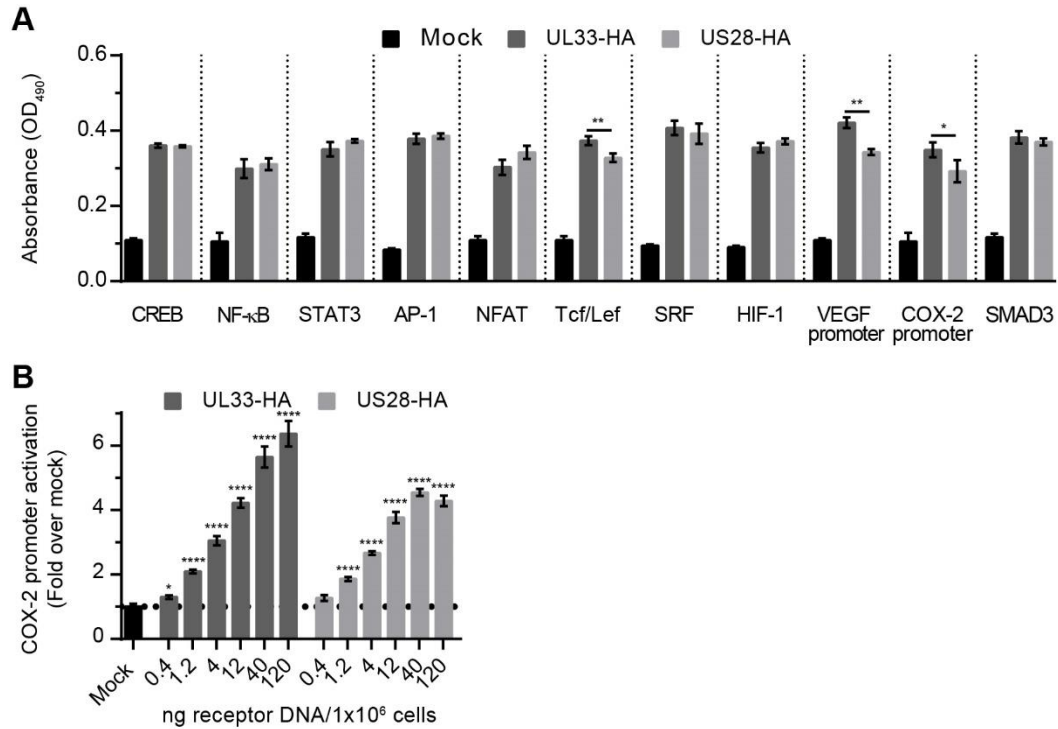

**Figure S1.** (A) Similar expression of UL33 and US28, as assessed by means of anti-HA ELISA, in HEK293T cells transfected with 12 ng UL33-HA or 40 ng US28-HA DNA per  $10^6$  cells in combination with the respective luciferase reporter gene constructs. UL33 and US28 were both C-terminally tagged with the HA-epitope. (B) Constitutive COX-2 promoter activation in HEK293T cells transiently transfected with the COX-2 promoter reporter gene and increasing amounts of DNA encoding UL33-HA or US28-HA. Graphs are representatives of at least three individual experiments performed in triplicate. Data are depicted as mean  $\pm$  S.D. \*  $p < 0.05$ , \*\*  $p < 0.01$  and \*\*\*\*  $p < 0.0001$ .

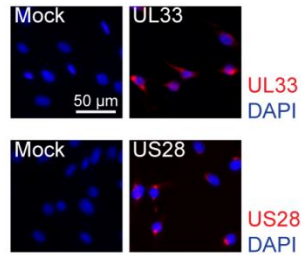

**Figure S2. Expression of UL33 and US28 in NIH-3T3 cells.** Immunofluorescence imaging of receptor expression in NIH-3T3 cells stably transfected with empty vector (Mock), UL33-eGFP or US28. UL33 and US28 were visualized using polyclonal antibodies raised against the receptors (1,2).

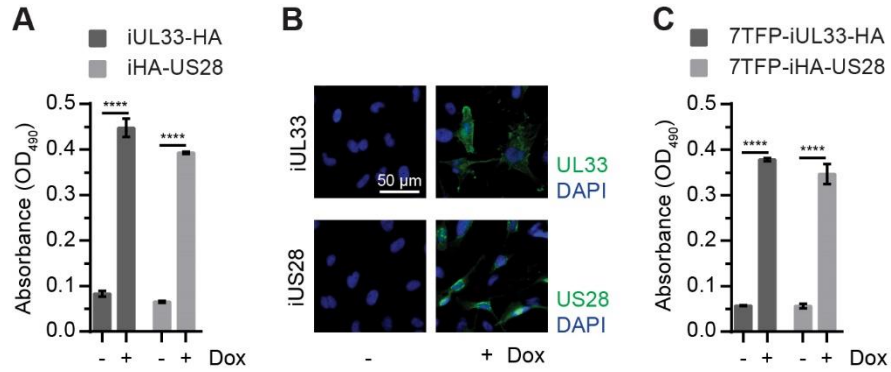

**Figure S3.** Doxycycline-dependent receptor expression in U251 iUL33-HA and U251 iHA-US28 cells (**A**), U251 iUL33 and U251 iUS28 cells (**B**), or U251-7TFP iUL33-HA and U251-7TFP iHA-US28 cells (**C**) as determined using anti-HA ELISA (**A and C**) and immunofluorescence microscopy using polyclonal antibodies raised against the respective receptor (1,2) (**B**). (**A and C**) The HA-epitope was located C-terminally of UL33 and at the N-terminus of US28. Graphs are representatives of three individual experiments performed in triplicate. Data are depicted as mean  $\pm$  S.D. \*\*\*\* $p < 0.0001$ .

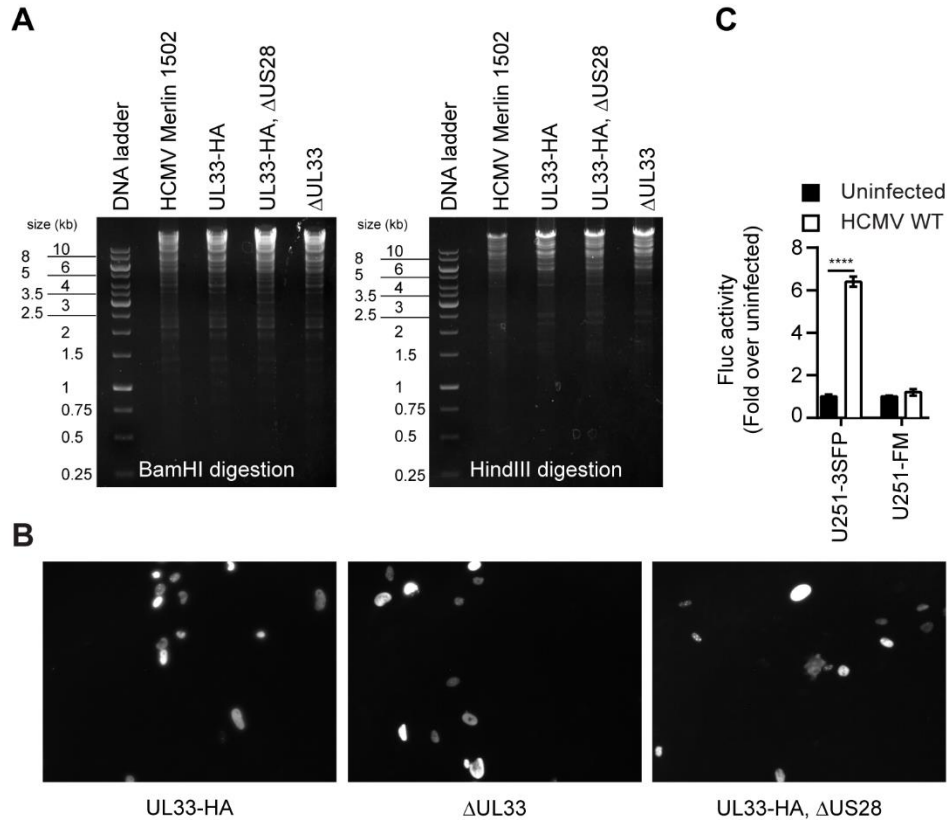

**Figure S4.** (A) BamHI and HindIII digestion patterns of HCMV Merlin 1502 (starting material), WT (UL33-HA), US28 knockout (UL33-HA, ΔUS28) and UL33 knockout (ΔUL33) BAC DNA. (B) Similar infection rate of U251-3SFP cells infected with wild type (UL33-HA), UL33 knockout (ΔUL33) or US28 knockout (UL33-HA, ΔUS28) Merlin virus, as determined by IE1 staining at five days post infection. Pictures show representatives of 6 frames per well. (C) Effect of HCMV infection on STAT3-driven transcription (U251-3SFP) vs constitutive transcriptional activity (U251-FM), at five days post infection at MOI 6. Graphs are representatives of three individual experiments performed in triplicate. Data are depicted as mean ± S.D. \*\*\*\*p<0.0001.

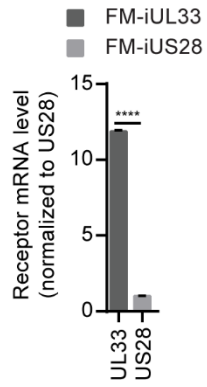

**Figure S5.** Relative receptor mRNA expression in U251-FM-iUL33 and U251-FM-iUS28 cell lines. Receptor mRNA abundance was determined by RT-qPCR for their shared 3' UTR. Graph is representative of three individual experiments performed in triplicate. Data are depicted as mean  $\pm$  S.D. \*\*\*\*p<0.0001.

## References

1. Bongers, G., Maussang, D., Muniz, L. R., Noriega, V. M., Fraile-Ramos, A., Barker, N., Marchesi, F., Thirunarayanan, N., Vischer, H. F., Qin, L., Mayer, L., Harpaz, N., Leurs, R., Furtado, G. C., Clevers, H., Tortorella, D., Smit, M. J., and Lira, S. A. (2010) The cytomegalovirus-encoded chemokine receptor US28 promotes intestinal neoplasia in transgenic mice. *J Clin Invest* **120**, 3969-3978
2. Margulies, B. J., Browne, H., and Gibson, W. (1996) Identification of the human cytomegalovirus G protein-coupled receptor homologue encoded by UL33 in infected cells and enveloped virus particles. *Virology* **225**, 111-125
